# Supplementary material for: A microcrystalline cellulose ingrained polydimethylsiloxane triboelectric nanogenerator as a self-powered locomotion detector
Source: Royal Society of Chemistry journal article supplement (doi:10.1039/c6tc05104a), 2017-01-01
Supplement: c6tc05104a1.pdf [file c6tc05104a1.pdf]

**Supporting Information**

**Microcrystalline cellulose ingrained PDMS triboelectric  
nanogenerator as a self powered locomotion detector**

Arunkumar Chandrasekhar<sup>1</sup>, Nagamalleswara Rao Alluri<sup>2</sup>, Balasubramaniam  
Saravanakumar<sup>3</sup>, Sophia Selvarajan<sup>4</sup>, Sang-Jae Kim<sup>1\*</sup>

<sup>1,3\*</sup> Nanomaterials and System Lab, Department of Mechatronics Engineering,  
Jeju National University, Jeju 690-756, Republic of Korea

<sup>2</sup> Faculty of Applied Energy System, Department of Mechanical Engineering,  
Jeju National University, Jeju 690-756, Republic of Korea

<sup>4</sup> Department of the Next Generation Convergence Technology, Jeju National University,  
Jeju 690-756, Republic of Korea

\*Corresponding author: Tel: +82-64-754-3715; Fax: +82-64-756-3886

Email: kimsangj@jejunu.ac.kr;

Address : Jeju National University, Jeju 690-756, Republic of Korea

## **Table of Contents**

- Table S1** Band assignments of pure PDMS revealed from Raman spectra
- Table S2** Band assignments of microcrystalline cellulose revealed from Raman spectra.
- Figure S1** FE-SEM image of (a) plain PDMS, (b) Cellulose/PDMS, (c) cross section view of Cellulose/PDMS (d) cross section view of Cellulose/PDMS.
- Figure S2** Energy harvesting mechanism of the C-TENG.
- Figure S3.** Digital image of instantaneous lit up of 60 green and blue LED array
- Figure S4** 1  $\mu$ F capacitor was charged using hand force and inset shows the lit up of different color LEDs during hand pressing on the C-TENG.
- Figure S5.** Top view FE-SEM image of Cellulose/PDMS film after few thousand cycles of operation.
- Figure S6** Logic circuit diagram of self-powered locomotion detector and digital photograph of LCD display which displaying the moving object location code.
- Figure S7** Frequency components after Fourier transformation of harvested voltage during human motion (walking).
- Figure S8.** Real-time Capacitor charging circuit using C-TENG

## Calculation of the applied force

Here the external force using a linear motor. Hence, the force were calculated with equation,

$$F = m \times a \quad - (1)$$

F = Force

m = Mass

a = Acceleration

### Example:

$$m = 2.144 \text{ Kg}$$

$$a = 15 \text{ m/s}$$

Hence,

$$F = 2.144 \text{ Kg} \times 15 \text{ m/s}$$

$$\mathbf{F = 32.16 \text{ N}}$$

## Calculation of peak power and power density

$$Power = I^2 \times R \quad - (2)$$

$$\mathbf{Peak Power = 576 \mu W}$$

$$Power Density = Power / Area \quad - (3)$$

$$Power Density = 576 \mu W / 9 \text{ cm}^2$$

$$\mathbf{Power Density = 64 \mu W/cm^2}$$

## Specification of Maxwell CR 2032 battery

|                                         |                                          |
|-----------------------------------------|------------------------------------------|
| Model                                   | CR2032                                   |
| System                                  | Manganese dioxide–Li/Organic Electrolyte |
| Nominal Voltage (V)                     | 3                                        |
| Nominal Capacity (mAh)*                 | 220                                      |
| Nominal Discharge Current (mA)          | 0.2                                      |
| Operating Temperature Range (deg. C) ** | –20 to +85                               |
| Weight (g) ***                          | 3.0                                      |
| Dimensions (mm) ***                     |                                          |
| Diameter                                | 20.0                                     |
| Height                                  | 3.2                                      |
| UL Recognition                          | MH12568                                  |

| <b>Crystalline (cm<sup>-1</sup>)</b> | <b>Band assignment</b>                |
|--------------------------------------|---------------------------------------|
| 488                                  | Si-O-Si stretching                    |
| 687                                  | Si- CH <sub>3</sub> Rocking vibration |
| 787                                  |                                       |
| 862                                  |                                       |
| 1262                                 | Methyl bending vibration              |
| 1412                                 |                                       |
| 2907                                 | Methyl group stretching vibration     |
| 2965                                 |                                       |

**Table S1.** Band assignments of pure PDMS revealed from Raman spectra

| <b>Crystalline (cm<sup>-1</sup>)</b> | <b>Band assignment</b>                                                                                                                |
|--------------------------------------|---------------------------------------------------------------------------------------------------------------------------------------|
| 171 w                                | COH methane bending                                                                                                                   |
| 380 s                                | CCC, COC, OCC, OCO skeletal bending,<br>CCH, COH methane bending,<br>movement of CC, CO groups<br>within the glucopyranose ring units |
| 437 s                                |                                                                                                                                       |
| 458 s                                |                                                                                                                                       |
| 520 s                                |                                                                                                                                       |
| 904 w                                |                                                                                                                                       |
| 3331s                                | OH stretching                                                                                                                         |

**Table S2.** Band assignments of microcrystalline cellulose revealed from Raman spectra

Here Figure S1 (a) shows the FE-SEM image of a plain PDMS here we can observe a clear surface without any surface roughness. When the microcrystalline cellulose ingrained with the PDMS solution and dried, the cellulose is settled in the lower layer of film. During peeling of the film from the mould, the microcrystalline cellulose particles is on the top layer of the PDMS film as shown in the Figure S1 (b-c). The cross section view of the Cellulose/PDMS is shown in the figure S1 (d), it clearly represents the formation of Cellulose/PDMS film. The microcrystalline cellulose on the top layer of the PDMS film formed an irregular settlement (as shown in the FE-SEM image Figure S1 (b-c)) which interacts with the aluminum film and generates the triboelectricity due to the triboelectric charge difference between the active layer (Microcrystalline cellulose/PDMS) and the top electrode (aluminum film).

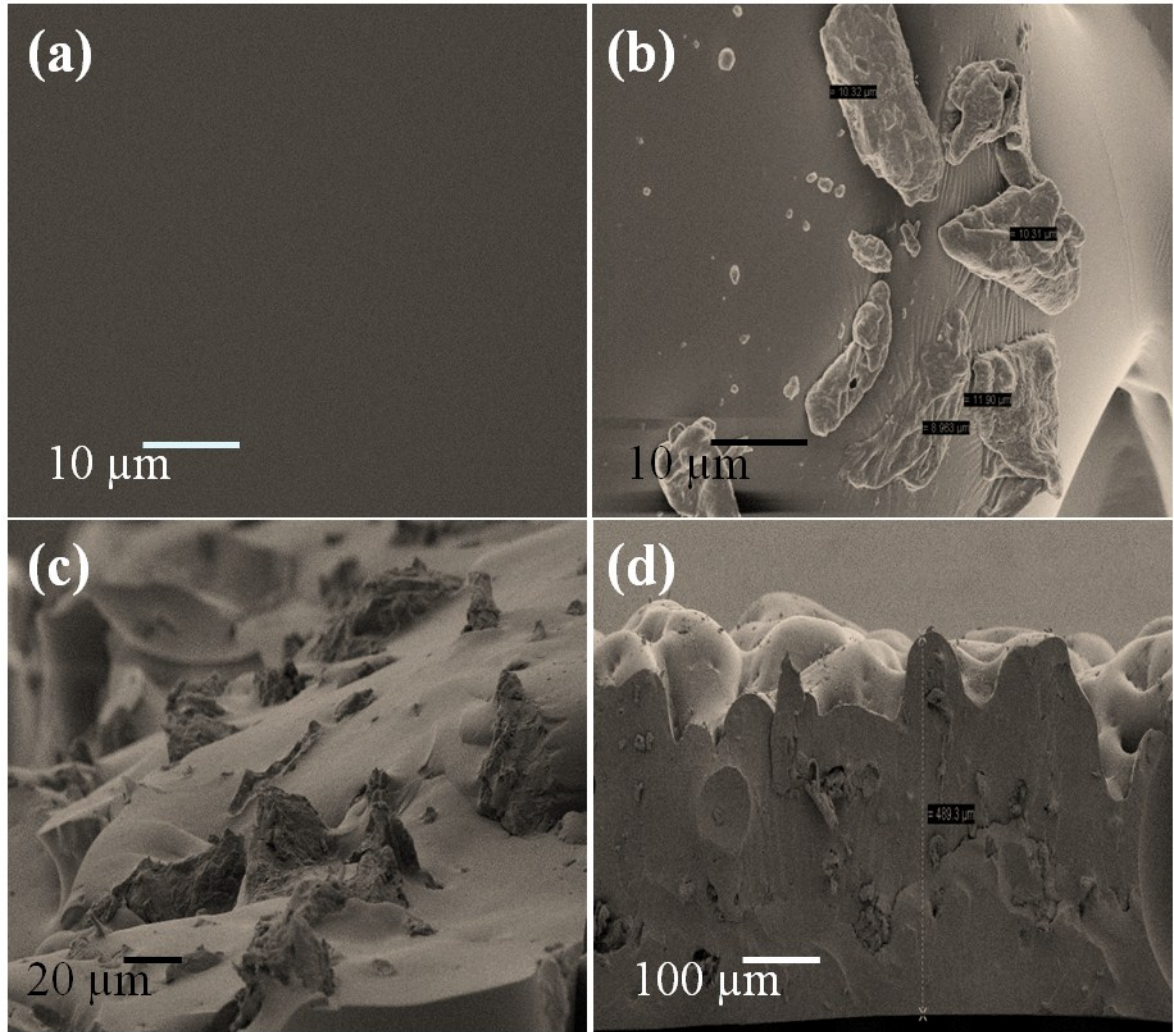

**Figure S1.** FE-SEM image of (a) plain PDMS, (b) Cellulose/PDMS, (c) cross section view of Cellulose/PDMS (d) cross section view of Cellulose/PDMS.



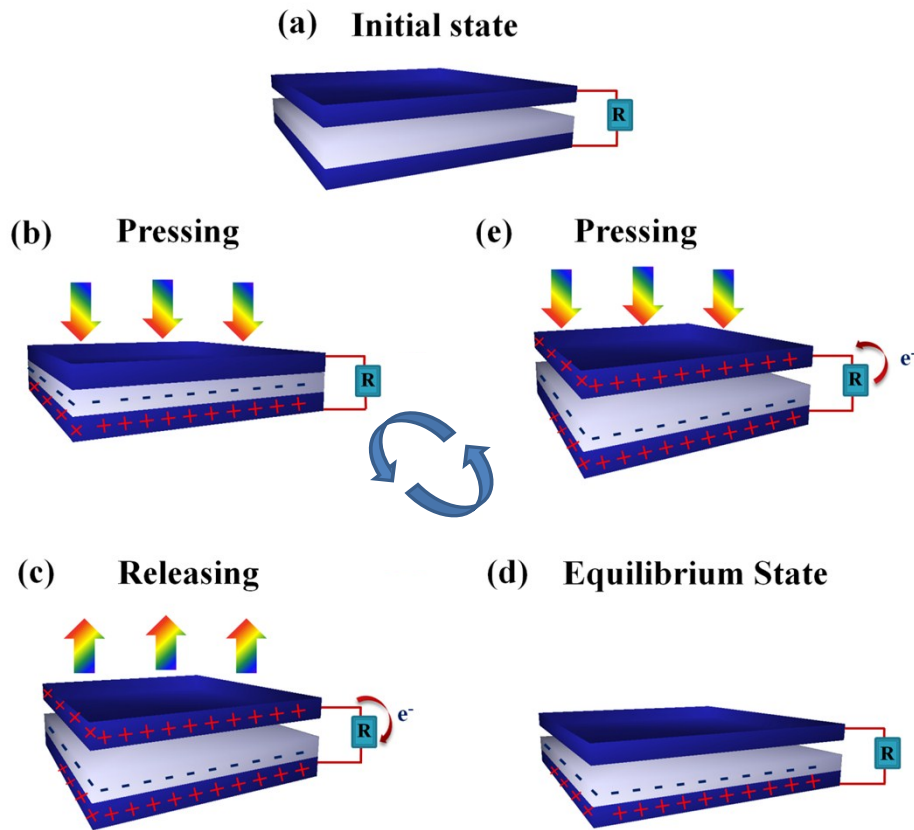

**Figure S2.** Energy harvesting mechanism of the C-TENG.

(a) Initial position of the upper Al electrode and cellulose/PDMS surface with Al electrodes separated by air-gap. (b) An external force causes interaction between the upper electrode and the cellulose/PDMS surface, inducing positive triboelectric charges on the upper Al electrode and negative triboelectric charges on the cellulose/PDMS surface. (c) Release of the external force causes electrons to flow from the upper Al electrode to the bottom electrode through an external circuit. (d) In the equilibrium state, where the charge carriers are distributed on both sides of the layers. (e) Electrons are driven back owing to the applied external force, reducing the inductive charge on the Al electrode.

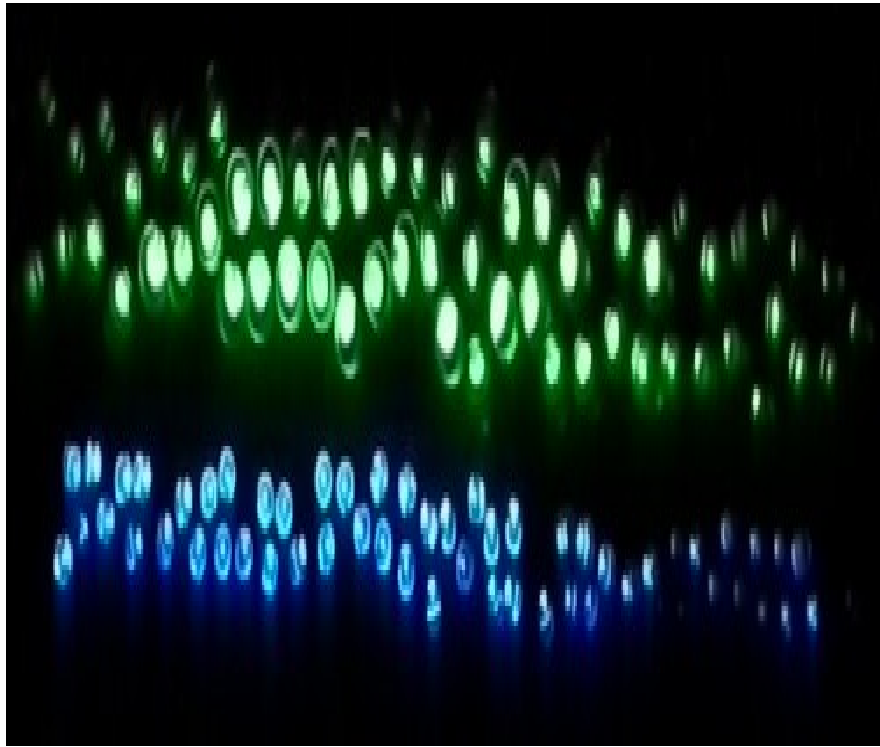

**Figure S3.** Digital image of instantaneous lit up of 60 green and blue LED array

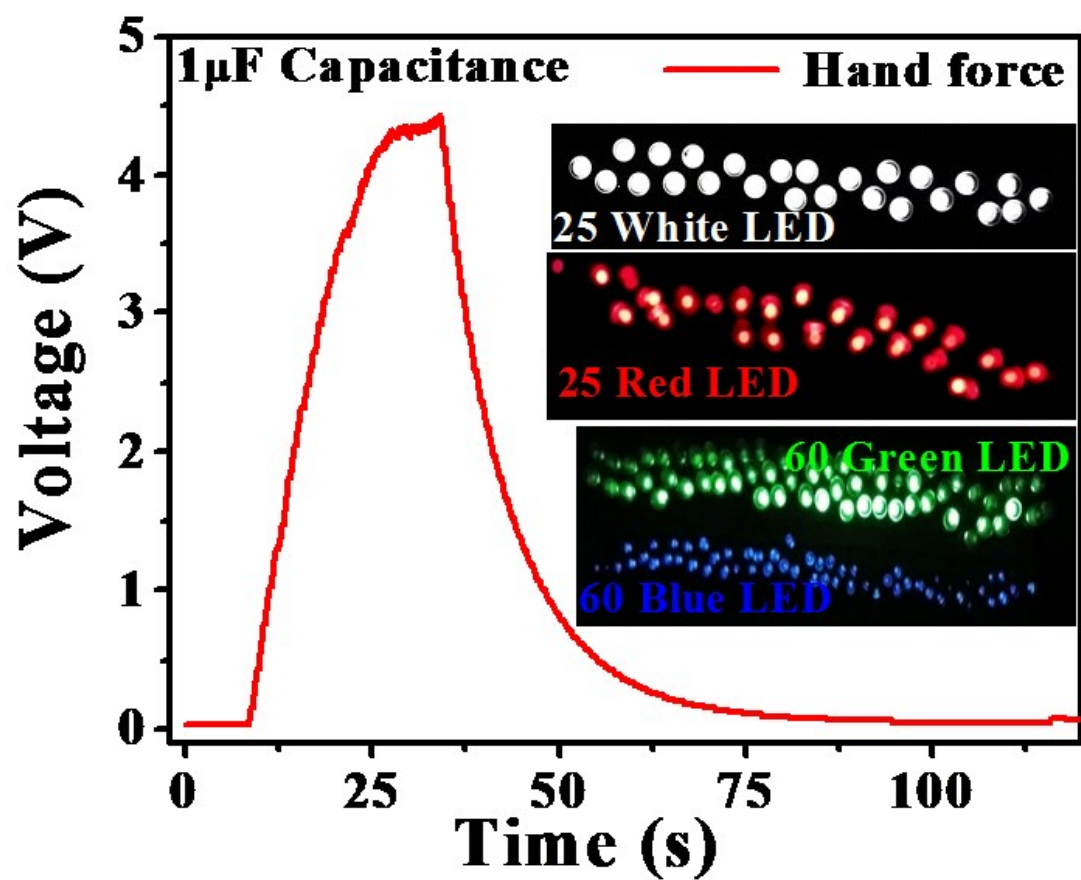

**Figure S4.** 1  $\mu\text{F}$  capacitor was charged using hand force and inset shows the lit up of different color LEDs during hand pressing on the C-TENG.

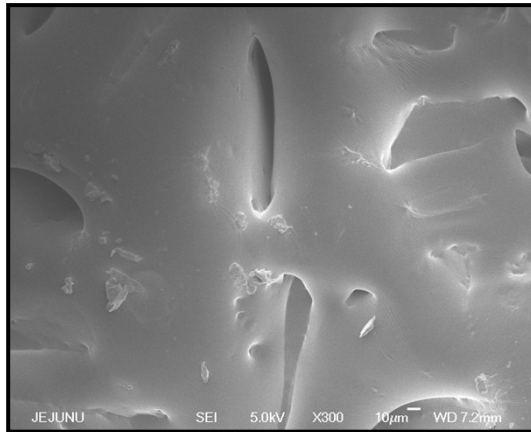

**Figure S5.** Top view FE-SEM image of Cellulose/PDMS film after few thousand cycles of operation.

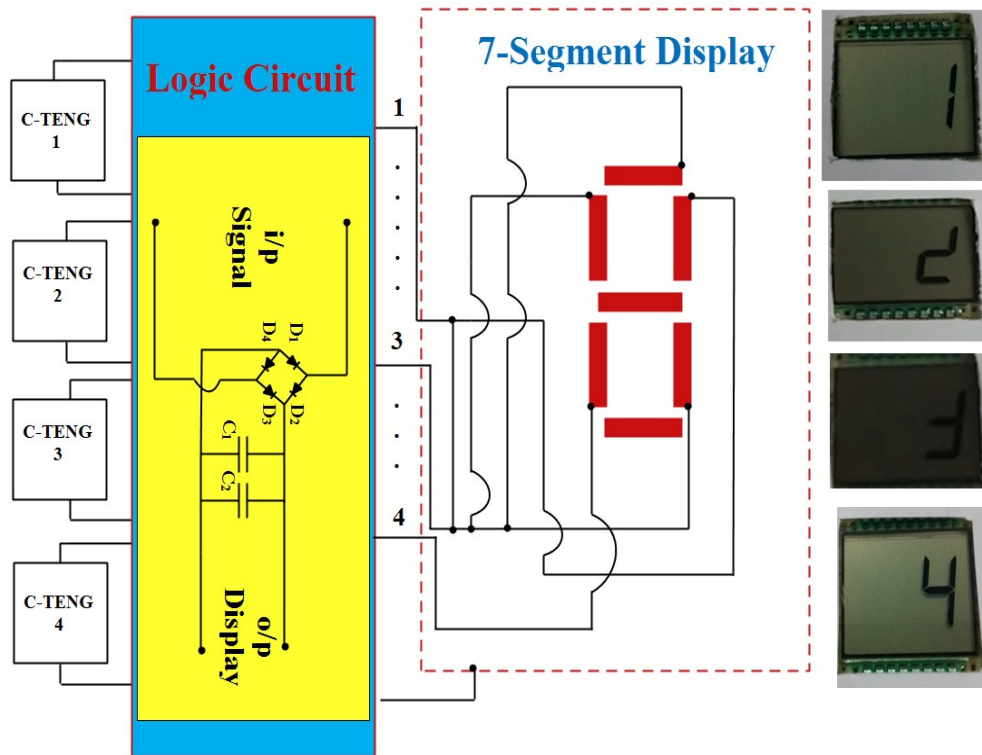

**Figure S6.** Logic circuit diagram of self-powered locomotion detector and digital photograph of LCD display which displaying the moving object location code.

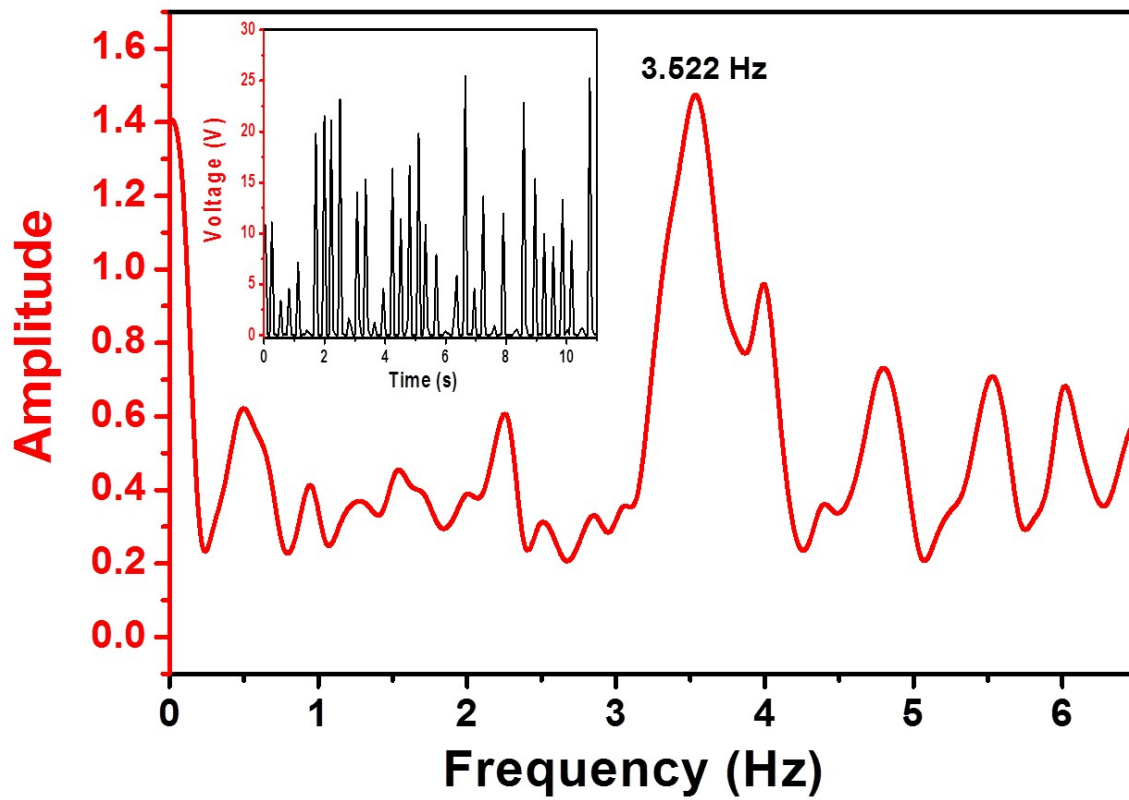

**Figure S7.** Frequency components after Fourier transformation of harvested voltage during human motion (walking). Inset corresponding harvested voltage.

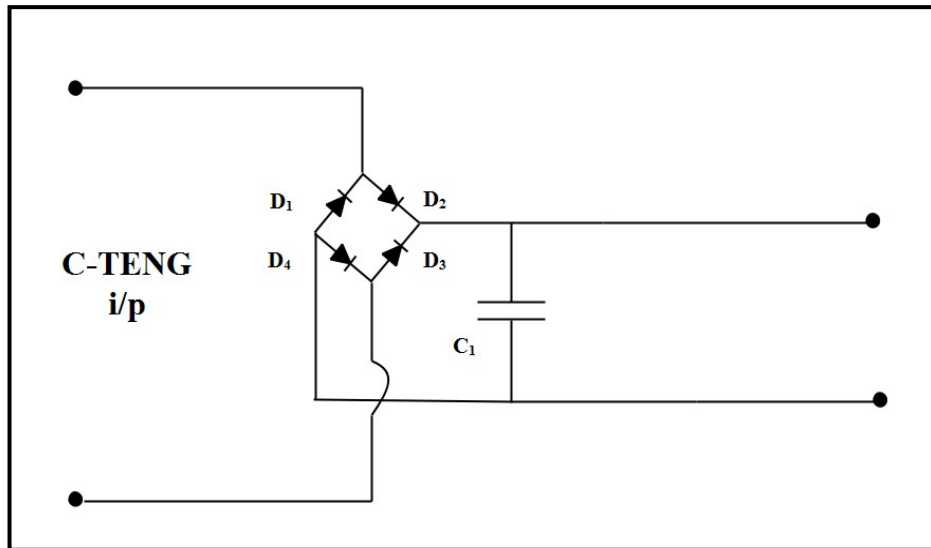

**Figure S8.** Real-time capacitor charging circuit using C-TENG
